# Supplementary material for: Enhancing immune response and survival in hepatocellular carcinoma with novel oncolytic Jurona virus and immune checkpoint blockade
Source: PubMed Central journal article supplement (PMC11697550; doi:10.1016/j.omton.2024.200913), 2024-11-26
Supplement: mmc1.pdf [file mmc1.pdf]

## **Supplemental information**

### **Enhancing immune response and survival in hepatocellular carcinoma with novel oncolytic Jurona virus and immune checkpoint blockade**

**Mulu Z. Tesfay, Yuguo Zhang, Khandoker U. Ferdous, Mika A. Taylor, Aleksandra Cios, Randal S. Shelton, Camila C. Simoes, Chelsae R. Watters, Oumar Barro, Natalie M. Elliott, Bahaa Mustafa, Jean Christopher Chamcheu, Alicia L. Graham, Charity L. Washam, Duah Alkam, Allen Gies, Stephanie D. Byrum, Emmanouil Giorgakis, Steven R. Post, Thomas Kelly, Jun Ying, Omeed Moaven, Chiswili Y. Chabu, Martin E. Fernandez-Zapico, Dan G. Duda, Lewis R. Roberts, Rang Govindarajan, Mitesh J. Borad, Martin J. Cannon, Alexei G. Basnakian, and Bolni M. Nagalo**

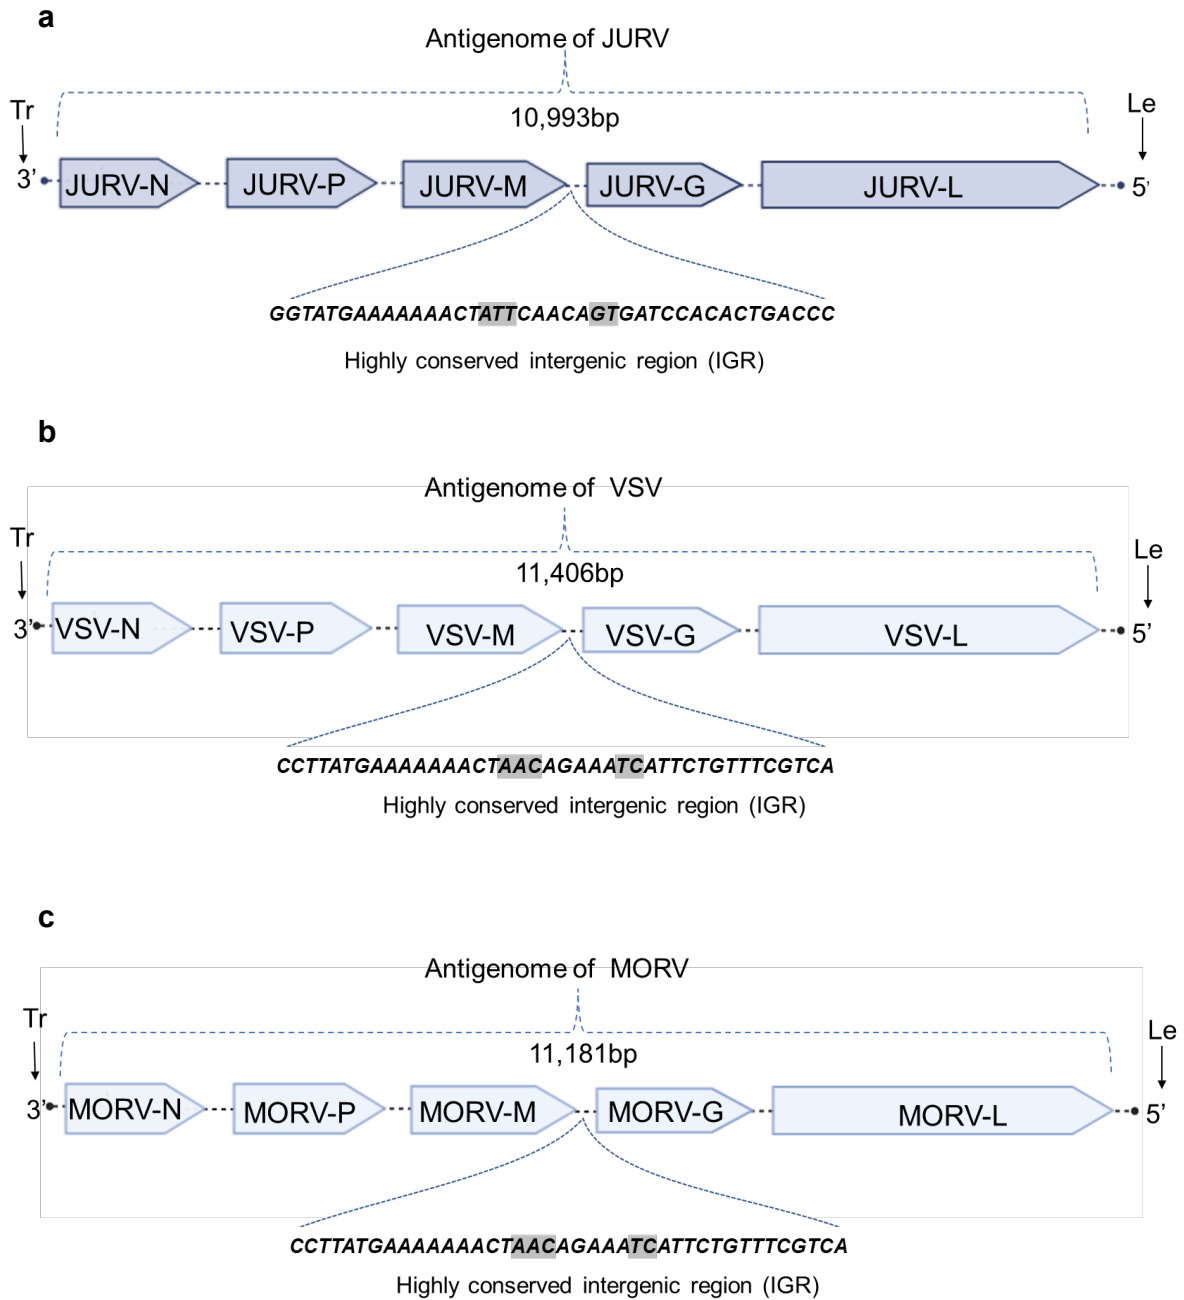

**Figure S1.** Schematic representation of the antigenomic structure of JURV, VSV, and MORV. The antigenome of JURV is typical of that of Rhabdovirus and consists of 5 major genes from the 3' to 5' antigenomic direction: nucleoprotein (JURV-N), phosphoprotein (JURV-P), matrix (JURV-M), glycoprotein (JURV-G), polymerase (JURV-L). Schematic representation of the 3' to 5' antigenomic organization of lab adapted a) Jurona virus (JURV), b) Vesicular stomatitis virus (VSV), and c) Morreton virus (MORV). The gene junctions' intergenic region (IGR) differed between the 3 viruses.

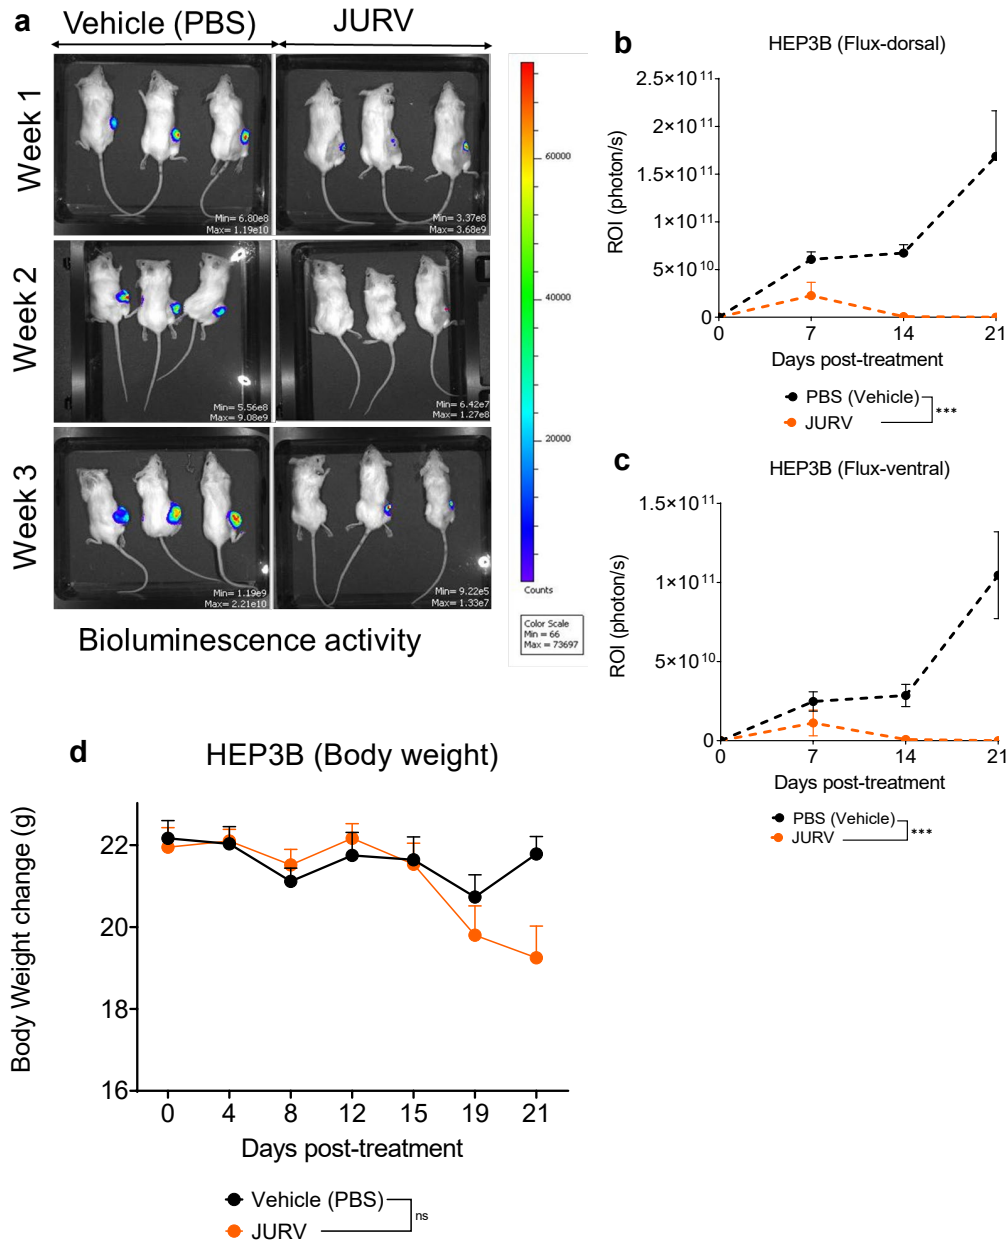

**Figure S2.** Oncolytic JURV induces a robust virus-mediated oncolysis dependent tumor growth delay in JURV in Hep3B Xenografts. Female NOD.Cg-Prkdcscid/J (Strain #:001303) mice (n=6-7/group) were inoculated subcutaneously with human luciferase-expressing HEP3B cells. (a) Photon emission from mice with subcutaneous HEP3B tumors. When the average tumor volume reached 80-120 mm<sup>3</sup>, mice were divided into two groups and received IT injections with either PBS or JURV (1.0 x 10<sup>7</sup> TCID<sub>50</sub>) on days 0, 7, and 14. Photon counts were obtained on weeks 1, 2, and 3. Photon emission at the right dorsal flanks (b) and ventral (c) were significantly (P<0.005) reduced among JURV-treated mice compared to PBS controls.

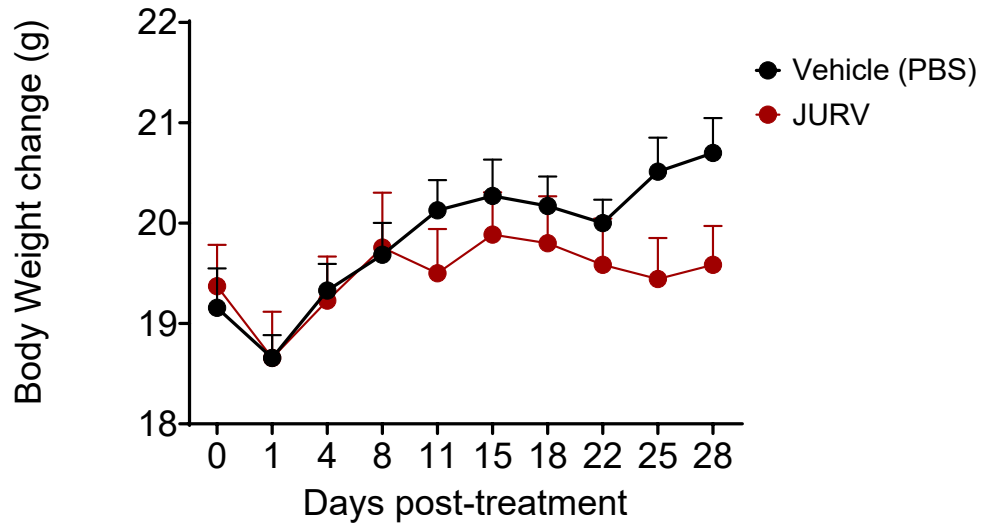

**Figure S3.** Changes in body weight of Hepa 1-6 tumor-bearing mice Treated with oncolytic JURV

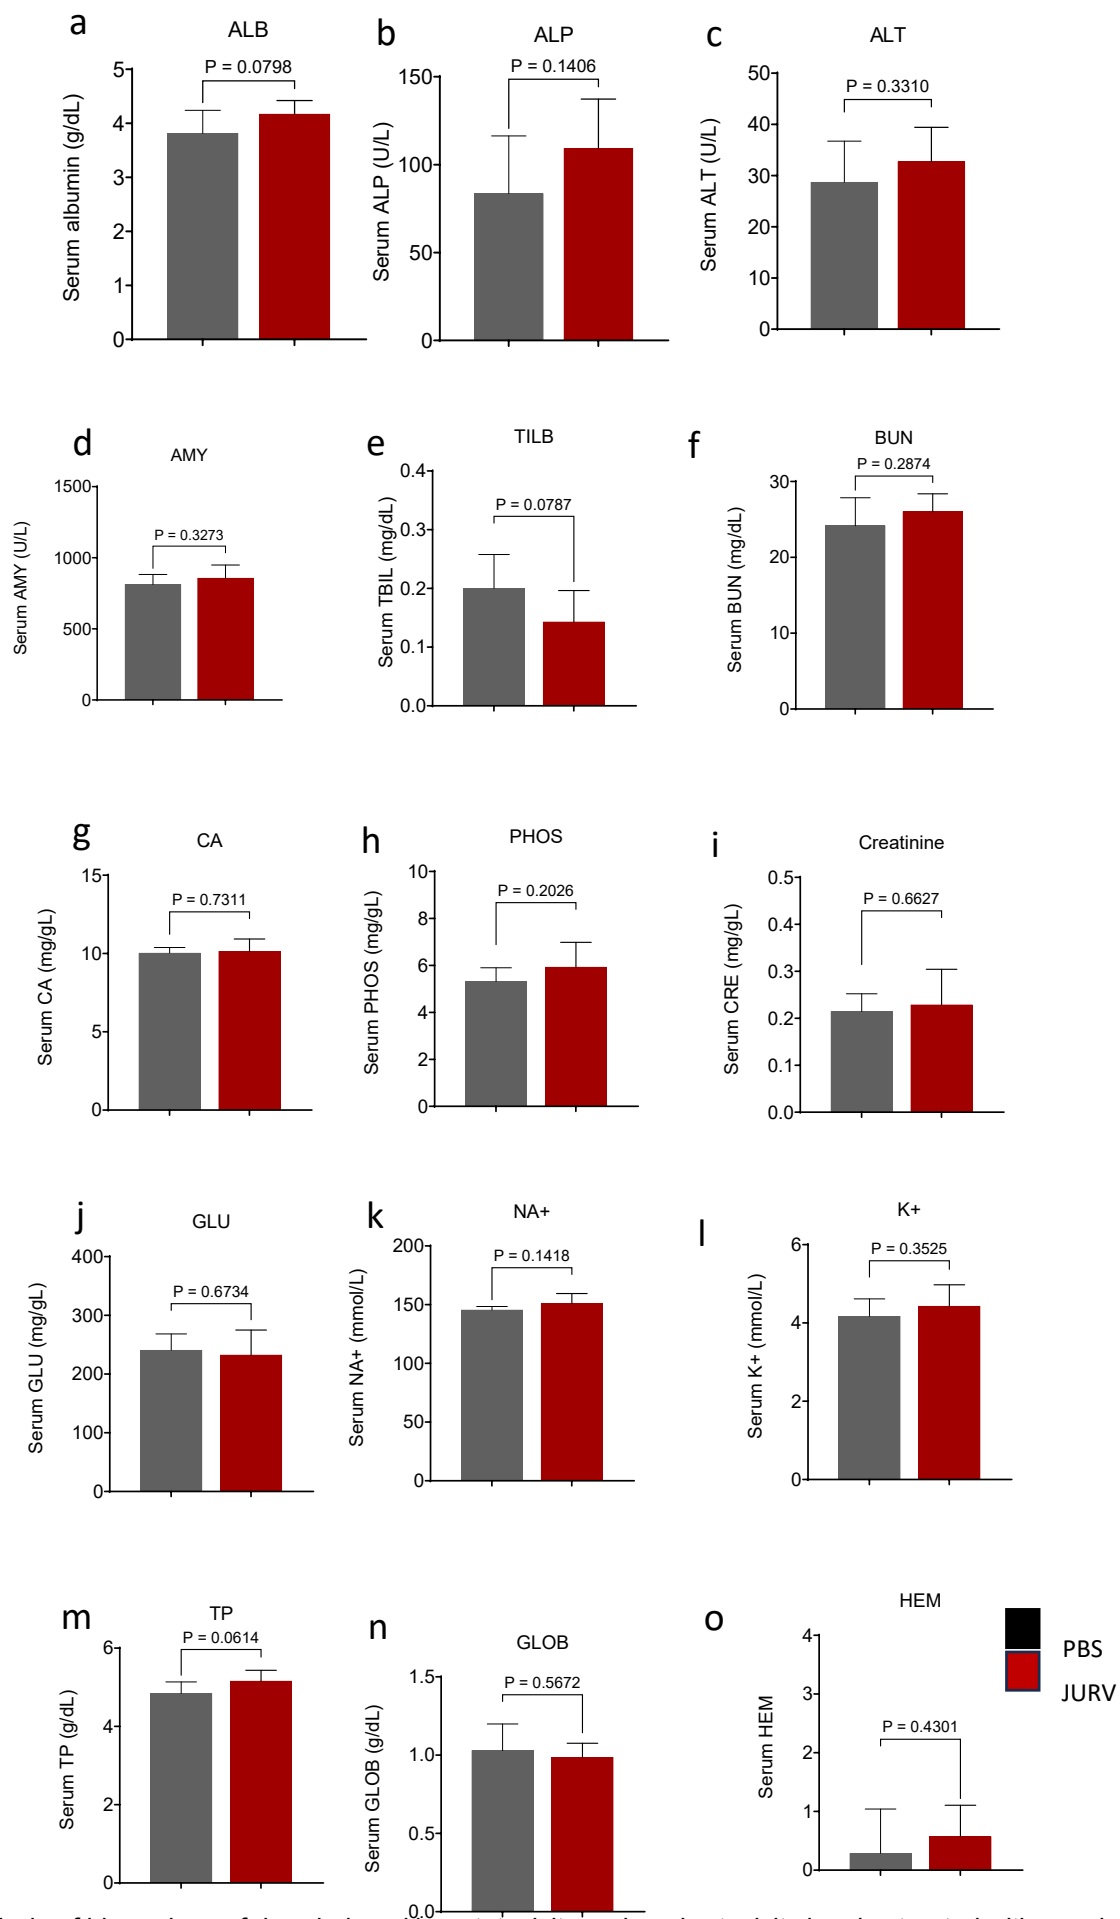

**Figure S4.** Analysis of biomarkers of drug-induced hepatotoxicity and nephrotoxicity in mice treated with oncolytic JURV. Changes in the serum biomarkers of drug-induced toxicity, including albumin (a, ALB), alkaline phosphatase (b, ALP), alanine aminotransferase (c, ALT), amylase (d, AMY), total bilirubin (e, TILB), blood urea nitrogen (f, BUN), calcium (g, CA), phosphate (h, PHOS), creatinine (i), glutamine (j, GLU), sodium (k, NA<sup>+</sup>), potassium (l, K<sup>+</sup>), total protein (m, TP), serum globulin (n, GLOB), and serum hemoglobin (o, HEM).

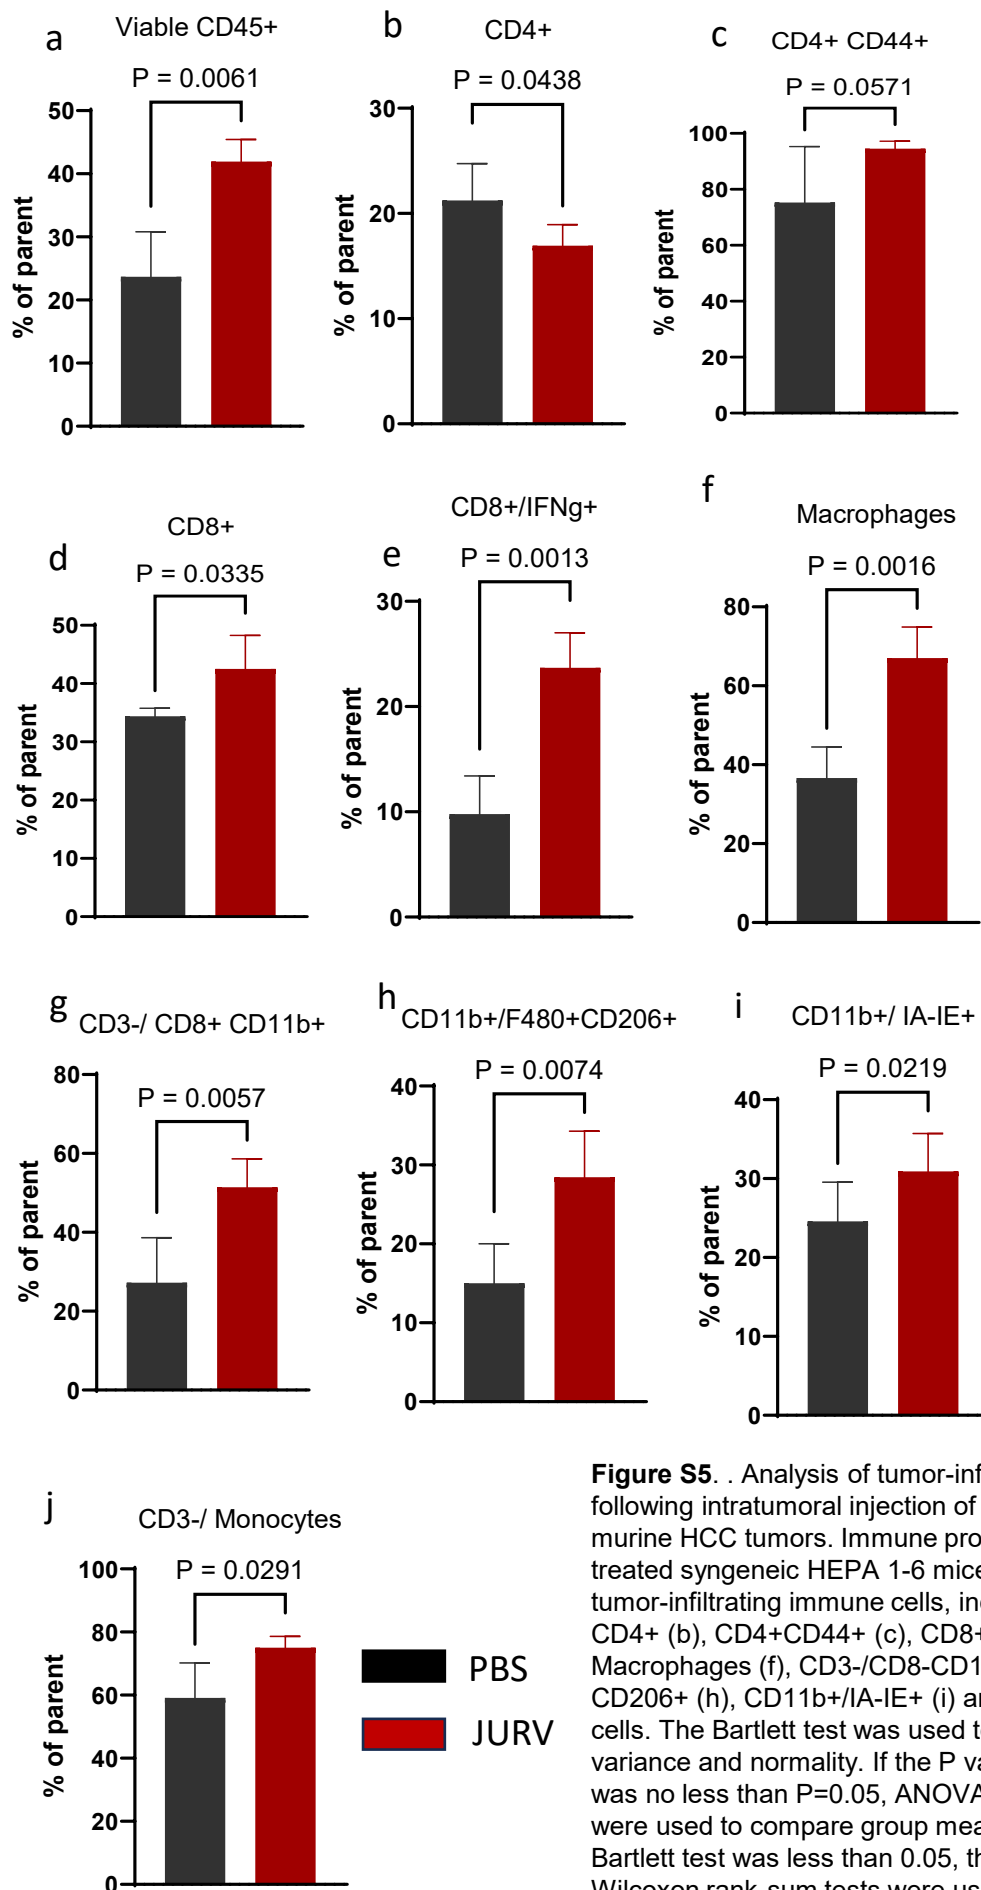

**Figure S5.** . Analysis of tumor-infiltrating immune cells following intratumoral injection of oncolytic JURV in murine HCC tumors. Immune profiling of PBS or JURV treated syngeneic HEPA 1-6 mice showing percentage of tumor-infiltrating immune cells, including CD45+ (a), CD4+ (b), CD4+CD44+ (c), CD8+ (d), CD8+IFN $\gamma$ + (e), Macrophages (f), CD3-/CD8-CD11b+ (g), CD11b+/F4/80+CD206+ (h), CD11b+/IA-IE+ (i) and CD3-/Monocytes (j) cells. The Bartlett test was used to test homogeneity of variance and normality. If the P value of the Bartlett test was no less than P=0.05, ANOVA and a two-sample t test were used to compare group means. If the P value of the Bartlett test was less than 0.05, the Kruskal-Wallis and Wilcoxon rank-sum tests were used to compare group means. The figures demonstrate the potential significant difference of the gated subsets in the CD45+ population, determined by the P value.

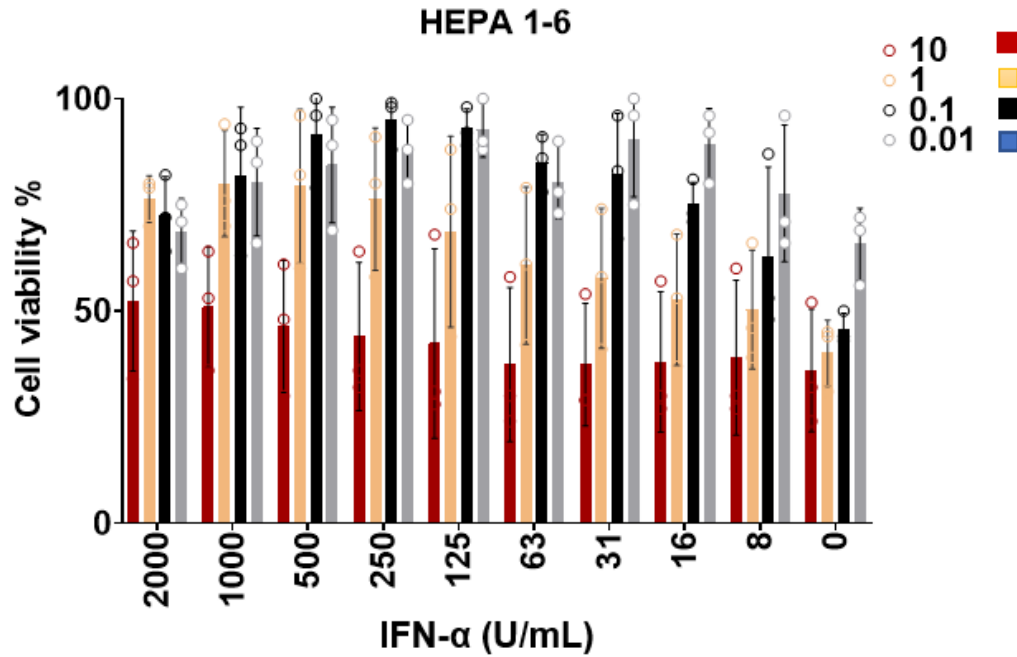

**Figure S6.** Dose-dependent response to treatment with type interferon on the oncolytic activity of JURV. Murine (HEPA 1-6) HCC cells ( $2.0 \times 10^4$ ) were pretreated with various concentrations of universal type I interferon-alpha (IFN- $\alpha$ ), infected with viruses at MOI of 10, 1, 0.1 and 0.01. Cell viability was measured using an MTS assay after 48 hours post-infection. Results are from 3 independent experiments and are plotted as mean  $\pm$  SEM.

**Table S1** . List of antibodies for flow cytometry

| <b>Markers</b>     | <b>Fluorochrome</b> | <b>Clone</b> | <b>Catalog</b> | <b>Isotypes</b>          | <b>Vender</b> |
|--------------------|---------------------|--------------|----------------|--------------------------|---------------|
| <b>CD45</b>        | FITC                | 30-F11       | 553079         | Rat IgG2b, κ             | BD            |
| <b>CD3</b>         | BUV395              | 145-2C11     | 563565         | Armenian Hamster IgG1, κ | BD            |
| <b>CD4</b>         | BUV737              | GK1.5        | 612761         | Rat IgG2b, κ             | BD            |
| <b>CD8</b>         | Percp-Cy5.5         | 53-6.7       | 45-0081-82     | Rat IgG2a, κ             | eBioscience   |
| <b>CD44</b>        | BV711               | IM7          | 103057         | Rat IgG2b, κ             | Biologend     |
| <b>CD335</b>       | PE/DAzzle594        | 29A1.4       | 137630         | Rat IgG2a, κ             | Biologend     |
| <b>PD-1</b>        | PE                  | J43          | 551892         | Armenian Hamster IgG2, κ | BD            |
| <b>Ki67*</b>       | BV605               | 16A8         | 652413         | Rat IgG2a, κ             | Biologend     |
| <b>Granzyme B*</b> | APC                 | APC          | QA18A28        | 396408                   | Biologend     |
| <b>IFN-γ*</b>      | BV421               | XMG1.2       | 563376         | Rat IgG1, κ              | BD            |
| <b>CD11b</b>       | PE-Cy7              | M1/70        | 101216         | Rat IgG2b, κ             | Biologend     |
| <b>F4/80</b>       | BV510               | BM8          | 123135         | Rat IgG2a, κ             | Biologend     |
| <b>CD206</b>       | AF700               | C068C2       | 141734         | Rat IgG2a, κ             | Biologend     |
| <b>I-A/I-E</b>     | BV786               | 2G9          | 743875         | Rat IgG2a, κ             | BD            |
| <b>L/D</b>         | efluo780            | NA           | 65-0865-18     | NA                       | eBioscience   |

\* Ki67, Granzyme B and IFN-γ\* are the intracellular targets.
